# Supplementary material
Source: HighWire-hosted journal article supplement (https://ebm.bmj.com/content/26/3/109)
Supplement: inline-supplementary-material-1 [file inline-supplementary-material-1.pdf]

## Blinding in randomised clinical trials of psychological interventions: a retrospective study of published trial reports

Sophie Juul, Christian Gluud, Sebastian Simonsen, Frederik Weischer Frandsen, Irving Kirsch, Janus Christian Jakobsen

### Supplementary file 1. Recent meta-epidemiological studies assessing the association between blinding status and outcome

| Meta-epidemiological study | Data source                                                   | Number of meta-analyses included | Number of trials included | Which trial key persons' blinding status were studied? | ROR* in blinding domains                                                                                                                                                                                                                                                                                                                                                                                                                                                                                                                         | Were risk of bias assessments copied from the meta-analyses or reassessed? |
|----------------------------|---------------------------------------------------------------|----------------------------------|---------------------------|--------------------------------------------------------|--------------------------------------------------------------------------------------------------------------------------------------------------------------------------------------------------------------------------------------------------------------------------------------------------------------------------------------------------------------------------------------------------------------------------------------------------------------------------------------------------------------------------------------------------|----------------------------------------------------------------------------|
| Savović et al. (2018)      | Cochrane Database of Systematic Reviews (Issue 4, April 2011) | 228                              | 2,443                     | Participants, personnel, outcome assessors             | ROR for lack of blinding of participants, personnel and outcome assessors<br><br>ROR 0.87, 95% CrI** 0.80 to 0.93                                                                                                                                                                                                                                                                                                                                                                                                                                | Copied                                                                     |
| Moustgaard et al. (2020)   | Cochrane Database of Systematic Reviews (2013-14)             | 142                              | 1,153                     | Patients, healthcare providers, outcome assessors      | ROR for lack of blinding of patients:<br><br>0.91, 95% CrI 0.61 to 1.34, on patient reported outcomes and<br><br>0.98, 95% CrI 0.69 to 1.39, on outcomes reported by blinded observers<br><br>ROR for lack of blinding of healthcare providers:<br><br>1.01, 95% CrI 0.84 to 1.19, on healthcare provider decision outcomes and<br><br>0.97, 95% CrI 0.64 to 1.45 on outcomes reported by blinded patients or observers<br><br>ROR for lack of blinding of observers:<br><br>1.01, 95% CrI 0.86 to 1.18 on subjective observer reported outcomes | Reassessed                                                                 |

\* ROR; Relative odds ratio, \*\*CrI; Credible interval
